# Supplementary material
Source: PubMed Central journal article supplement (PMC5858740)
Supplement: NIHMS949097-supplement-Supplemental_Figures.pdf [file NIHMS949097-supplement-Supplemental_Figures.pdf]

## **Comprehensive functional characterization of the Glycoside Hydrolase Family 3 enzymes from *Cellvibrio japonicus* reveals unique metabolic roles in biomass saccharification**

Cassandra E. Nelson<sup>a</sup>, Mohamed A. Attia<sup>b,c</sup>, Artur Rogowski<sup>d</sup>, Carl Morland<sup>d</sup>, Harry Brumer<sup>b,c,e,f</sup>, and Jeffrey G. Gardner<sup>a#</sup>

### **Running Title**

Complex glucan utilization in *C. japonicus*

### **Keywords**

$\beta$ -glucosidase, *Cellvibrio japonicus*, lignocellulose, mixed-linkage beta-glucan, xyloglucan

### **Author Affiliations**

<sup>a</sup> Department of Biological Sciences, University of Maryland – Baltimore County, Maryland, USA

<sup>b</sup> Michael Smith Laboratories, University of British Columbia, Vancouver, Canada

<sup>c</sup> Department of Chemistry, University of British Columbia, Vancouver, Canada.

<sup>d</sup> Institute for Cell and Molecular Biosciences, Newcastle University, Newcastle Upon Tyne, UK.

<sup>e</sup> Department of Biochemistry and Molecular Biology, University of British Columbia, Vancouver, Canada

<sup>f</sup> Department of Botany, University of British Columbia, Vancouver, Canada

### **#Correspondence**

Jeffrey G. Gardner

Department of Biological Sciences

University of Maryland - Baltimore County

Email: [jgardner@umbc.edu](mailto:jgardner@umbc.edu)

Phone: 410-455-3613

Fax: 410-455-3875

## Supplemental Tables

**Table S1A. Growth statistics of *E. coli* GH3 heterologous expression strains grown in a defined glucose medium (corresponding to Figure 2A)<sup>a</sup>**

| Strain                             | Growth Rate<br>(gen hr <sup>-1</sup> ) | Lag Time<br>(hrs) | Max OD <sub>600</sub> |
|------------------------------------|----------------------------------------|-------------------|-----------------------|
| Empty Vector Control <sup>bc</sup> | 0.24±0.001                             | 5                 | 1.03±0.01             |

<sup>a</sup> Experiments were performed in biological triplicate

<sup>b</sup> Time points used to calculate growth rate were T<sub>i</sub>=6 and T<sub>f</sub>=12

<sup>c</sup> All heterologous expression strains grew as the empty vector control

**Table S1B. Growth statistics of *E. coli* GH3 heterologous expression strains grown in a defined sophorose medium (corresponding to Figure 2B)<sup>a</sup>**

| Strain                                  | Growth Rate<br>(gen hr <sup>-1</sup> ) | Lag Time<br>(hrs) | Max OD <sub>600</sub> |
|-----------------------------------------|----------------------------------------|-------------------|-----------------------|
| Empty Vector Control                    | ND <sup>b</sup>                        | ND                | 0.13±0.003            |
| K12pBBRMCS-5/ <i>bgl3A</i> <sup>c</sup> | 0.17±0.003                             | 21                | 0.95±0.02             |
| K12pBBRMCS-5/ <i>bgl3B</i>              | ND                                     | ND                | 0.14±0.003            |
| K12pBBRMCS-5/ <i>bgl3C</i> <sup>d</sup> | 0.13±0.02                              | 33                | 0.80±0.02             |
| K12pBBRMCS-5/ <i>bgl3D</i> <sup>e</sup> | 0.13±0.02                              | 27                | 0.92±0.10             |

<sup>a</sup> Experiments were performed in biological triplicate

<sup>b</sup> Not Determined due to lack of growth

<sup>c</sup> Time points used to calculate growth rate were T<sub>i</sub>=22 and T<sub>f</sub>=28

<sup>d</sup> Time points used to calculate growth rate were T<sub>i</sub>=30 and T<sub>f</sub>=40

<sup>e</sup> Time points used to calculate growth rate were T<sub>i</sub>=28 and T<sub>f</sub>=34

**Table S1C. Growth statistics of *E. coli* GH3 heterologous expression strains grown in a defined gentiobiose medium (corresponding to Figure 2C)<sup>a</sup>**

| Strain                                  | Growth Rate<br>(gen hr <sup>-1</sup> ) | Lag Time<br>(hrs) | Max OD <sub>600</sub> |
|-----------------------------------------|----------------------------------------|-------------------|-----------------------|
| Empty Vector Control                    | ND <sup>b</sup>                        | ND                | 0.12±0.004            |
| K12pBBRMCS-5/ <i>bgl3A</i> <sup>c</sup> | 0.06±0.002                             | 10                | 0.70±0.01             |
| K12pBBRMCS-5/ <i>bgl3B</i>              | ND                                     | ND                | 0.14±0.004            |
| K12pBBRMCS-5/ <i>bgl3C</i> <sup>d</sup> | 0.08±0.003                             | 8                 | 0.72±0.02             |
| K12pBBRMCS-5/ <i>bgl3D</i> <sup>e</sup> | 0.07±0.0001                            | 8                 | 0.77±0.01             |

<sup>a</sup> Experiments were performed in biological triplicate

<sup>b</sup> Not Determined due to lack of growth

<sup>c</sup> Time points used to calculate growth rate were T<sub>i</sub>=22 and T<sub>f</sub>=28

<sup>d</sup> Time points used to calculate growth rate were T<sub>i</sub>=30 and T<sub>f</sub>=40

<sup>e</sup> Time points used to calculate growth rate were T<sub>i</sub>=28 and T<sub>f</sub>=34

**Table S1D. Growth statistics of *E. coli* GH3 heterologous expression strains grown in a defined laminaribiose medium (corresponding to Figure 2D)<sup>a</sup>**

| Strain                                  | Growth Rate<br>(gen hr <sup>-1</sup> ) | Lag Time<br>(hrs) | Max OD <sub>600</sub> |
|-----------------------------------------|----------------------------------------|-------------------|-----------------------|
| Empty Vector Control <sup>b</sup>       | 0.07±0.002                             | 22                | 0.61±0.002            |
| K12pBBRMCS-5/ <i>bgl3A</i> <sup>c</sup> | 0.23±0.01                              | 5                 | 0.71±0.01             |
| K12pBBRMCS-5/ <i>bgl3B</i> <sup>d</sup> | 0.09±0.0002                            | 15                | 0.86±0.02             |
| K12pBBRMCS-5/ <i>bgl3C</i> <sup>c</sup> | 0.12±0.01                              | 5                 | 0.68±0.06             |
| K12pBBRMCS-5/ <i>bgl3D</i> <sup>c</sup> | 0.22±0.004                             | 5                 | 0.71±0.004            |

<sup>a</sup> Experiments were performed in biological triplicate

<sup>b</sup> Time points used to calculate growth rate were T<sub>i</sub>=32 and T<sub>f</sub>=44

<sup>c</sup> Time points used to calculate growth rate were T<sub>i</sub>=6 and T<sub>f</sub>=12

<sup>d</sup> Time points used to calculate growth rate were T<sub>i</sub>=16 and T<sub>f</sub>=22

**Table S1E. Growth statistics of *C. japonicus* GH3 mutants grown in a defined sophorose medium (corresponding to Figure 3)<sup>a</sup>**

| Strain                                                                         | Growth Rate<br>(gen hr <sup>-1</sup> ) | Lag Time<br>(hrs) | Max OD <sub>600</sub> |
|--------------------------------------------------------------------------------|----------------------------------------|-------------------|-----------------------|
| Wild Type <sup>b</sup>                                                         | 0.29±0.01                              | 4                 | 1.24±0.16             |
| $\Delta$ <i>bgl3A</i> <sup>c</sup>                                             | 0.19±0.005                             | 8                 | 1.05±0.003            |
| $\Delta$ <i>bgl3B</i> <sup>d</sup>                                             | 0.24±0.004                             | 5                 | 1.13±0.003            |
| $\Delta$ <i>bgl3C</i> <sup>b</sup>                                             | 0.28±0.003                             | 4                 | 1.11±0.01             |
| $\Delta$ <i>bgl3D</i> <sup>b</sup>                                             | 0.30±0.004                             | 4                 | 1.13±0.003            |
| Wild Type <sup>e</sup>                                                         | 0.28±0.003                             | 3                 | 1.41±0.01             |
| $\Delta$ <i>bgl3A</i> $\Delta$ <i>bgl3B</i> <sup>f</sup>                       | 0.24±0.003                             | 9                 | 1.18±0.01             |
| $\Delta$ <i>bgl3A</i> $\Delta$ <i>bgl3C</i>                                    | ND <sup>g</sup>                        | ND                | 0.14±0.01             |
| $\Delta$ <i>bgl3A</i> $\Delta$ <i>bgl3D</i> <sup>h</sup>                       | 0.27±0.01                              | 9                 | 1.31±0.01             |
| $\Delta$ <i>bgl3B</i> $\Delta$ <i>bgl3C</i> <sup>b</sup>                       | 0.21±0.01                              | 4                 | 1.31±0.02             |
| $\Delta$ <i>bgl3B</i> $\Delta$ <i>bgl3D</i> <sup>i</sup>                       | 0.22±0.01                              | 4                 | 1.31±0.01             |
| $\Delta$ <i>bgl3C</i> $\Delta$ <i>bgl3</i> <sup>j</sup>                        | 0.26±0.003                             | 3                 | 1.34±0.01             |
| Wild Type <sup>k</sup>                                                         | 0.20±0.02                              | 3                 | 1.20±0.02             |
| $\Delta$ <i>bgl3A</i> $\Delta$ <i>bgl3B</i> $\Delta$ <i>bgl3C</i>              | ND                                     | ND                | 0.13±0.01             |
| $\Delta$ <i>bgl3A</i> $\Delta$ <i>bgl3B</i> $\Delta$ <i>bgl3D</i>              | ND                                     | ND                | 0.10±0.01             |
| $\Delta$ <i>bgl3A</i> $\Delta$ <i>bgl3C</i> $\Delta$ <i>bgl3D</i>              | ND                                     | ND                | 0.10±0.01             |
| $\Delta$ <i>bgl3B</i> $\Delta$ <i>bgl3C</i> $\Delta$ <i>bgl3D</i> <sup>b</sup> | 0.15±0.02                              | 4                 | 1.19±0.02             |
| $\Delta$ 4 $\beta$ G                                                           | ND                                     | ND                | 0.10±0.004            |

<sup>a</sup> Experiments were performed in biological triplicate

<sup>b</sup> Time points used to calculate growth rate were T<sub>i</sub>=5 and T<sub>f</sub>=10

<sup>c</sup> Time points used to calculate growth rate were T<sub>i</sub>=9 and T<sub>f</sub>=19

<sup>d</sup> Time points used to calculate growth rate were T<sub>i</sub>=6 and T<sub>f</sub>=14

<sup>e</sup> Time points used to calculate growth rate were T<sub>i</sub>=4 and T<sub>f</sub>=10

<sup>f</sup> Time points used to calculate growth rate were  $T_i=10$  and  $T_f=17$

<sup>g</sup> Not determined due to lack of growth

<sup>h</sup> Time points used to calculate growth rate were  $T_i=10$  and  $T_f=14$

<sup>i</sup> Time points used to calculate growth rate were  $T_i=5$  and  $T_f=19$

<sup>j</sup> Time points used to calculate growth rate were  $T_i=4$  and  $T_f=9$

<sup>k</sup> Time points used to calculate growth rate were  $T_i=4$  and  $T_f=8$

**Table S1F. Growth statistics of *C. japonicus* GH3 mutants grown in a defined laminaribiose medium (corresponding to Figure 4A-C)<sup>a</sup>**

| Strain                                                | Growth Rate<br>(gen hr <sup>-1</sup> ) | Lag Time<br>(hrs) | Max OD <sub>600</sub> |
|-------------------------------------------------------|----------------------------------------|-------------------|-----------------------|
| Wild Type <sup>b</sup>                                | 0.29±0.01                              | 3                 | 1.14±0.02             |
| $\Delta bgl3A$ <sup>c</sup>                           | 0.21±0.002                             | 5                 | 1.05±0.01             |
| $\Delta bgl3B$ <sup>d</sup>                           | 0.40±0.02                              | 5                 | 1.14±0.01             |
| $\Delta bgl3C$ <sup>e</sup>                           | 0.34±0.01                              | 3                 | 1.19±0.03             |
| $\Delta bgl3D$ <sup>f</sup>                           | 0.30±0.02                              | 3                 | 1.08±0.01             |
| Wild Type <sup>g</sup>                                | 0.32±0.04                              | 4                 | 1.19±0.03             |
| $\Delta bgl3A \Delta bgl3B$ <sup>h</sup>              | 0.23±0.003                             | 4                 | 1.08±0.01             |
| $\Delta bgl3A \Delta bgl3C$ <sup>i</sup>              | 0.16±0.002                             | 9                 | 0.91±0.001            |
| $\Delta bgl3A \Delta bgl3D$ <sup>j</sup>              | 0.24±0.03                              | 6                 | 1.04±0.01             |
| $\Delta bgl3B \Delta bgl3C$ <sup>k</sup>              | 0.29±0.01                              | 3                 | 1.17±0.04             |
| $\Delta bgl3B \Delta bgl3D$ <sup>k</sup>              | 0.27±0.02                              | 3                 | 1.14±0.01             |
| $\Delta bgl3C \Delta bgl3D$ <sup>l</sup>              | 0.32±0.02                              | 4                 | 1.14±0.01             |
| Wild Type <sup>b</sup>                                | 0.29±0.01                              | 3                 | 1.14±0.02             |
| $\Delta bgl3A \Delta bgl3B \Delta bgl3C$ <sup>l</sup> | 0.09±0.01                              | 10                | 0.54±0.06             |
| $\Delta bgl3A \Delta bgl3B \Delta bgl3D$ <sup>m</sup> | 0.20±0.01                              | 6                 | 1.05±0.04             |
| $\Delta bgl3A \Delta bgl3C \Delta bgl3D$ <sup>n</sup> | 0.09±0.01                              | 11                | 0.32±0.02             |
| $\Delta bgl3B \Delta bgl3C \Delta bgl3D$ <sup>o</sup> | 0.33±0.11                              | 5                 | 1.05±0.23             |
| $\Delta 4\beta G$                                     | ND <sup>p</sup>                        | ND                | 0.10±0.001            |

<sup>a</sup> Experiments were performed in biological triplicate

<sup>b</sup> Time points used to calculate growth rate were  $T_i=4$  and  $T_f=8$

<sup>c</sup> Time points used to calculate growth rate were  $T_i=6$  and  $T_f=12$

<sup>d</sup> Time points used to calculate growth rate were  $T_i=6$  and  $T_f=10$

<sup>e</sup> Time points used to calculate growth rate were  $T_i=4$  and  $T_f=7$

<sup>f</sup> Time points used to calculate growth rate were  $T_i=4$  and  $T_f=9$

<sup>g</sup> Time points used to calculate growth rate were  $T_i=5$  and  $T_f=10$

<sup>h</sup> Time points used to calculate growth rate were  $T_i=5$  and  $T_f=13$

<sup>i</sup> Time points used to calculate growth rate were  $T_i=10$  and  $T_f=17$

<sup>j</sup> Time points used to calculate growth rate were  $T_i=7$  and  $T_f=12$

<sup>k</sup> Time points used to calculate growth rate were  $T_i=4$  and  $T_f=11$

<sup>l</sup> Time points used to calculate growth rate were  $T_i=11$  and  $T_f=21$

<sup>m</sup> Time points used to calculate growth rate were  $T_i=7$  and  $T_f=16$

<sup>n</sup> Time points used to calculate growth rate were  $T_i=12$  and  $T_f=24$

<sup>o</sup> Time points used to calculate growth rate were  $T_i=6$  and  $T_f=9$

<sup>p</sup> Not determined due to lack of growth

**Table S1G. Growth statistics of *C. japonicus* GH3 mutants grown in a defined curdlan medium (corresponding to Figure 4D-F)<sup>ab</sup>**

| Strain                                     | Growth Rate<br>(gen hr <sup>-1</sup> ) | Lag Time<br>(hrs) | Max OD <sub>600</sub> |
|--------------------------------------------|----------------------------------------|-------------------|-----------------------|
| Wild Type <sup>c</sup>                     | 0.14±0.04                              | 3                 | 0.19±0.002            |
| $\Delta bgl3A^d$                           | 0.13±0.01                              | 3                 | 0.18±0.003            |
| $\Delta bgl3B^e$                           | 0.20±0.03                              | 4                 | 0.19±0.01             |
| $\Delta bgl3C^f$                           | 0.12±0.02                              | 4                 | 0.17±0.002            |
| $\Delta bgl3D^f$                           | 0.16±0.01                              | 4                 | 0.19±0.002            |
| Wild Type <sup>d</sup>                     | 0.10±0.005                             | 3                 | 0.17±0.001            |
| $\Delta bgl3A \Delta bgl3B^d$              | 0.10±0.01                              | 3                 | 0.17±0.003            |
| $\Delta bgl3A \Delta bgl3C^g$              | 0.06±0.01                              | 7                 | 0.18±0.02             |
| $\Delta bgl3A \Delta bgl3D^d$              | 0.11±0.01                              | 3                 | 0.18±0.001            |
| $\Delta bgl3B \Delta bgl3C^d$              | 0.11±0.01                              | 3                 | 0.16±0.01             |
| $\Delta bgl3B \Delta bgl3D^e$              | 0.17±0.03                              | 4                 | 0.18±0.01             |
| $\Delta bgl3C \Delta bgl3D^d$              | 0.10±0.01                              | 3                 | 0.16±0.004            |
| Wild Type <sup>c</sup>                     | 0.14±0.04                              | 3                 | 0.19±0.002            |
| $\Delta bgl3A \Delta bgl3B \Delta bgl3C^h$ | 0.05±0.004                             | 8                 | 0.16±0.005            |
| $\Delta bgl3A \Delta bgl3B \Delta bgl3D^e$ | 0.20±0.001                             | 4                 | 0.19±0.01             |
| $\Delta bgl3A \Delta bgl3C \Delta bgl3D^i$ | 0.03±0.01                              | 13                | 0.13±0.01             |
| $\Delta bgl3B \Delta bgl3C \Delta bgl3D^f$ | 0.15±0.01                              | 4                 | 0.18±0.01             |
| $\Delta 4\beta G^j$                        | 0.02±0.002                             | 11                | 0.13±0.005            |

<sup>a</sup> Experiments were performed in biological triplicate

<sup>b</sup> Time points were taken every 15 minutes

<sup>c</sup> Time points used to calculate growth rate were T<sub>i</sub>=4 and T<sub>f</sub>=7

<sup>d</sup> Time points used to calculate growth rate were T<sub>i</sub>=4 and T<sub>f</sub>=6

<sup>e</sup> Time points used to calculate growth rate were T<sub>i</sub>=5 and T<sub>f</sub>=6

<sup>f</sup> Time points used to calculate growth rate were T<sub>i</sub>=5 and T<sub>f</sub>=7

<sup>g</sup> Time points used to calculate growth rate were T<sub>i</sub>=8 and T<sub>f</sub>=13

<sup>h</sup> Time points used to calculate growth rate were T<sub>i</sub>=9 and T<sub>f</sub>=13

<sup>i</sup> Time points used to calculate growth rate were T<sub>i</sub>=14 and T<sub>f</sub>=19

<sup>j</sup> Time points used to calculate growth rate were T<sub>i</sub>=12 and T<sub>f</sub>=22

**Table S1H. Growth statistics of *C. japonicus* GH3 mutants grown in a defined mixed linkage glucan medium (corresponding to Figure 4G-I)<sup>a</sup>**

| Strain                                                    | Growth Rate<br>(gen hr <sup>-1</sup> ) | Lag Time<br>(hrs) | Max OD <sub>600</sub> |
|-----------------------------------------------------------|----------------------------------------|-------------------|-----------------------|
| Wild Type <sup>b</sup>                                    | 0.31±0.03                              | 6                 | 1.00±0.05             |
| $\Delta$ bgI3A <sup>c</sup>                               | 0.21±0.02                              | 4                 | 1.01±0.04             |
| $\Delta$ bgI3B <sup>d</sup>                               | 0.33±0.01                              | 5                 | 1.04±0.06             |
| $\Delta$ bgI3C <sup>e</sup>                               | 0.25±0.02                              | 5                 | 0.99±0.08             |
| $\Delta$ bgI3D <sup>f</sup>                               | 0.26±0.04                              | 4                 | 0.97±0.07             |
| Wild Type <sup>g</sup>                                    | 0.36±0.02                              | 6                 | 1.02±0.01             |
| $\Delta$ bgI3A $\Delta$ bgI3B <sup>h</sup>                | 0.18±0.02                              | 9                 | 0.96±0.02             |
| $\Delta$ bgI3A $\Delta$ bgI3C <sup>i</sup>                | 0.23±0.02                              | 9                 | 1.05±0.001            |
| $\Delta$ bgI3A $\Delta$ bgI3D <sup>j</sup>                | 0.23±0.02                              | 7                 | 1.03±0.03             |
| $\Delta$ bgI3B $\Delta$ bgI3C <sup>d</sup>                | 0.29±0.02                              | 5                 | 0.94±0.01             |
| $\Delta$ bgI3B $\Delta$ bgI3D <sup>k</sup>                | 0.31±0.06                              | 7                 | 0.96±0.01             |
| $\Delta$ bgI3C $\Delta$ bgI3D <sup>c</sup>                | 0.23±0.01                              | 4                 | 1.05±0.11             |
| Wild Type <sup>b</sup>                                    | 0.31±0.03                              | 6                 | 1.00±0.05             |
| $\Delta$ bgI3A $\Delta$ bgI3B $\Delta$ bgI3C <sup>l</sup> | 0.17±0.02                              | 14                | 0.58±0.04             |
| $\Delta$ bgI3A $\Delta$ bgI3B $\Delta$ bgI3D <sup>m</sup> | 0.20±0.05                              | 11                | 1.01±0.03             |
| $\Delta$ bgI3A $\Delta$ bgI3C $\Delta$ bgI3D <sup>n</sup> | 0.21±0.01                              | 8                 | 0.92±0.03             |
| $\Delta$ bgI3B $\Delta$ bgI3C $\Delta$ bgI3D <sup>o</sup> | 0.39±0.08                              | 5                 | 1.03±0.04             |
| $\Delta$ 4 $\beta$ G <sup>p</sup>                         | 0.10±0.02                              | 15                | 0.34±0.02             |

<sup>a</sup> Experiments were performed in biological triplicate

<sup>b</sup> Time points used to calculate growth rate were T<sub>i</sub>=7 and T<sub>f</sub>=10

<sup>c</sup> Time points used to calculate growth rate were T<sub>i</sub>=5 and T<sub>f</sub>=13

<sup>d</sup> Time points used to calculate growth rate were T<sub>i</sub>=6 and T<sub>f</sub>=11

<sup>e</sup> Time points used to calculate growth rate were T<sub>i</sub>=6 and T<sub>f</sub>=12

<sup>f</sup> Time points used to calculate growth rate were T<sub>i</sub>=5 and T<sub>f</sub>=9

<sup>g</sup> Time points used to calculate growth rate were T<sub>i</sub>=7 and T<sub>f</sub>=11

<sup>h</sup> Time points used to calculate growth rate were T<sub>i</sub>=10 and T<sub>f</sub>=15

<sup>i</sup> Time points used to calculate growth rate were T<sub>i</sub>=10 and T<sub>f</sub>=14

<sup>j</sup> Time points used to calculate growth rate were T<sub>i</sub>=8 and T<sub>f</sub>=13

<sup>k</sup> Time points used to calculate growth rate were T<sub>i</sub>=6 and T<sub>f</sub>=11

<sup>l</sup> Time points used to calculate growth rate were T<sub>i</sub>=8 and T<sub>f</sub>=11

<sup>m</sup> Time points used to calculate growth rate were T<sub>i</sub>=15 and T<sub>f</sub>=20

<sup>n</sup> Time points used to calculate growth rate were T<sub>i</sub>=12 and T<sub>f</sub>=16

<sup>o</sup> Time points used to calculate growth rate were T<sub>i</sub>=9 and T<sub>f</sub>=12

<sup>p</sup> Time points used to calculate growth rate were T<sub>i</sub>=6 and T<sub>f</sub>=10

**Table S11. Growth statistics of *C. japonicus* GH3 mutants grown in a defined xyloglucan medium (corresponding to Figure 5A-C)<sup>a</sup>**

| Strain                                                | Growth Rate<br>(gen hr <sup>-1</sup> ) | Lag Time<br>(hrs) | Max OD <sub>600</sub> |
|-------------------------------------------------------|----------------------------------------|-------------------|-----------------------|
| Wild Type <sup>b</sup>                                | 0.30±0.04                              | 3                 | 1.03±0.15             |
| $\Delta bgl3A$ <sup>b</sup>                           | 0.27±0.05                              | 3                 | 1.01±0.14             |
| $\Delta bgl3B$ <sup>c</sup>                           | 0.34±0.02                              | 3                 | 1.00±0.08             |
| $\Delta bgl3C$ <sup>d</sup>                           | 0.36±0.01                              | 3                 | 1.26±0.07             |
| $\Delta bgl3D$ <sup>e</sup>                           | 0.17±0.003                             | 3                 | 1.12±0.03             |
| Wild Type <sup>d</sup>                                | 0.36±0.01                              | 3                 | 0.89±0.04             |
| $\Delta bgl3A \Delta bgl3B$ <sup>b</sup>              | 0.27±0.02                              | 3                 | 0.91±0.003            |
| $\Delta bgl3A \Delta bgl3C$ <sup>d</sup>              | 0.35±0.02                              | 3                 | 0.91±0.01             |
| $\Delta bgl3A \Delta bgl3D$ <sup>f</sup>              | 0.12±0.02                              | 5                 | 0.98±0.07             |
| $\Delta bgl3B \Delta bgl3C$ <sup>b</sup>              | 0.29±0.03                              | 3                 | 0.5±0.03              |
| $\Delta bgl3B \Delta bgl3D$ <sup>g</sup>              | 0.16±0.02                              | 2                 | 0.83±0.03             |
| $\Delta bgl3C \Delta bgl3D$ <sup>h</sup>              | 0.13±0.03                              | 6                 | 0.98±0.06             |
| Wild Type <sup>i</sup>                                | 0.26±0.01                              | 3                 | 0.90±0.07             |
| $\Delta bgl3A \Delta bgl3B \Delta bgl3C$ <sup>b</sup> | 0.23±0.04                              | 3                 | 0.74±0.11             |
| $\Delta bgl3A \Delta bgl3B \Delta bgl3D$ <sup>j</sup> | 0.13±0.01                              | 2                 | 0.58±0.004            |
| $\Delta bgl3A \Delta bgl3C \Delta bgl3D$ <sup>k</sup> | 0.13±0.01                              | 6                 | 0.97±0.06             |
| $\Delta bgl3B \Delta bgl3C \Delta bgl3D$ <sup>g</sup> | 0.14±0.003                             | 2                 | 0.63±0.05             |
| $\Delta 4\beta G$ <sup>l</sup>                        | 0.18±0.02                              | 5                 | 0.86±0.002            |

<sup>a</sup> Experiments were performed in biological triplicate

<sup>b</sup> Time points used to calculate growth rate were  $T_i=4$  and  $T_f=9$

<sup>c</sup> Time points used to calculate growth rate were  $T_i=4$  and  $T_f=7$

<sup>d</sup> Time points used to calculate growth rate were  $T_i=4$  and  $T_f=8$

<sup>e</sup> Time points used to calculate growth rate were  $T_i=4$  and  $T_f=13$

<sup>f</sup> Time points used to calculate growth rate were  $T_i=6$  and  $T_f=16$

<sup>g</sup> Time points used to calculate growth rate were  $T_i=3$  and  $T_f=9$

<sup>h</sup> Time points used to calculate growth rate were  $T_i=7$  and  $T_f=13$

<sup>i</sup> Time points used to calculate growth rate were  $T_i=4$  and  $T_f=10$

<sup>j</sup> Time points used to calculate growth rate were  $T_i=3$  and  $T_f=10$

<sup>k</sup> Time points used to calculate growth rate were  $T_i=7$  and  $T_f=15$

<sup>l</sup> Time points used to calculate growth rate were  $T_i=6$  and  $T_f=10$

**Table S1J. Growth statistics of *C. japonicus* GH3 mutants grown in a defined xyloglucan oligosaccharide medium (corresponding to Figure 5D)<sup>a</sup>**

| Strain                        | Growth Rate<br>(gen hr <sup>-1</sup> ) | Lag Time<br>(hrs) | Max OD <sub>600</sub> |
|-------------------------------|----------------------------------------|-------------------|-----------------------|
| Wild Type <sup>b</sup>        | 0.26±0.01                              | 8                 | 1.04±0.01             |
| $\Delta bgI3A^c$              | 0.27±0.01                              | 8                 | 1.02±0.01             |
| $\Delta bgI3B^d$              | 0.21±0.004                             | 8                 | 1.00±0.01             |
| $\Delta bgI3C^c$              | 0.16±0.01                              | 8                 | 1.03±0.01             |
| $\Delta bgI3D^e$              | 0.23±0.01                              | 10                | 0.76±0.01             |
| $\Delta bgI3B \Delta bgI3D^f$ | 0.14±0.004                             | 8                 | 0.71±0.01             |
| $\Delta 4\beta G^g$           | 0.15±0.01                              | 8                 | 0.67±0.01             |

<sup>a</sup> Experiments were performed in biological triplicate

<sup>b</sup> Time points used to calculate growth rate were T<sub>i</sub>=9 and T<sub>f</sub>=13

<sup>c</sup> Time points used to calculate growth rate were T<sub>i</sub>=9 and T<sub>f</sub>=14

<sup>d</sup> Time points used to calculate growth rate were T<sub>i</sub>=9 and T<sub>f</sub>=15

<sup>e</sup> Time points used to calculate growth rate were T<sub>i</sub>=11 and T<sub>f</sub>=14

<sup>f</sup> Time points used to calculate growth rate were T<sub>i</sub>=9 and T<sub>f</sub>=18

<sup>g</sup> Time points used to calculate growth rate were T<sub>i</sub>=9 and T<sub>f</sub>=17

**Table S1K. Growth statistics of *C. japonicus* GH3 mutants grown in a defined gentiobiose medium (corresponding to Figure S4)<sup>a</sup>**

| Strain                  | Growth Rate<br>(gen hr <sup>-1</sup> ) | Lag Time<br>(hrs) | Max OD <sub>600</sub> |
|-------------------------|----------------------------------------|-------------------|-----------------------|
| Wild Type <sup>bc</sup> | 0.36±0.004                             | 3                 | 1.16±0.004            |

<sup>a</sup> Experiments were performed in biological triplicate

<sup>b</sup> All mutant strains grew as wild type

<sup>c</sup> Time points used to calculate growth rate were T<sub>i</sub>=6 and T<sub>f</sub>=10

**Table S1L. Growth statistics of *C. japonicus* mutants grown in a defined xyloglucan medium (corresponding to Figure S6)<sup>a</sup>**

| Strain                          | Growth Rate<br>(gen hr <sup>-1</sup> ) | Lag Time<br>(hrs) | Max OD <sub>600</sub> |
|---------------------------------|----------------------------------------|-------------------|-----------------------|
| Wild Type <sup>b</sup>          | 0.24±0.01                              | 2                 | 1.05±0.04             |
| $\Delta xyIA^b$                 | 0.25±0.04                              | 2                 | 0.96±0.06             |
| $\Delta 4\beta G^c$             | 0.15±0.01                              | 3                 | 0.99±0.06             |
| $\Delta xyIA \Delta 4\beta G^d$ | 0.09±0.01                              | 2                 | 0.39±0.01             |
| $\Delta xyI31A$                 | ND <sup>e</sup>                        | ND                | 0.15±0.02             |

<sup>a</sup> Experiments were performed in biological triplicate

<sup>b</sup> Time points used to calculate growth rate were T<sub>i</sub>=3 and T<sub>f</sub>=9

<sup>c</sup> Time points used to calculate growth rate were T<sub>i</sub>=4 and T<sub>f</sub>=12

<sup>d</sup> Time points used to calculate growth rate were T<sub>i</sub>=3 and T<sub>f</sub>=11



<sup>e</sup> Not Determined due to lack of growth

**Table S2. Strains, plasmids, and primers used in this study**

| Strain, plasmid, or primer                                                            | Genotype or Sequence                                                                                                                                                                                     | Source or Reference              |
|---------------------------------------------------------------------------------------|----------------------------------------------------------------------------------------------------------------------------------------------------------------------------------------------------------|----------------------------------|
| <b>Strains</b>                                                                        |                                                                                                                                                                                                          |                                  |
| <i>E. coli</i> DH5 $\alpha$                                                           | $\lambda$ - $\Phi$ 80d/ <i>lacZ</i> $\Delta$ M15 $\Delta$ ( <i>lacZYA-argF</i> )U169 <i>recA1 endA1 hsdR17</i> (r <sub>k</sub> <sup>-</sup> m <sub>k</sub> <sup>-</sup> ) <i>supE44 thi-1 gyrA relA1</i> | Laboratory collection            |
| <i>E. coli</i> S17 $\lambda_{pir}$                                                    | Tpr Smr <i>recA thi pro hsdR hsdM</i> <sup>+</sup> RP4-2-TC::Mu::Km Tn7 $\lambda_{pri}$                                                                                                                  | Laboratory collection            |
| <i>E. coli</i> K12                                                                    |                                                                                                                                                                                                          | Laboratory collection            |
| <i>E. coli</i> K12 / pBBRMCS-5                                                        | Gm <sup>r</sup>                                                                                                                                                                                          | (Nelson <i>et al.</i> , 2017)    |
| <i>E. coli</i> K12 / pBBRMCS-5- <i>bgl3A</i>                                          | <i>bgl3A</i> <sup>+</sup> ;Gm <sup>r</sup>                                                                                                                                                               | (Nelson <i>et al.</i> , 2017)    |
| <i>E. coli</i> K12 / pBBRMCS-5- <i>bgl3B</i>                                          | <i>bgl3B</i> <sup>+</sup> ;Gm <sup>r</sup>                                                                                                                                                               | (Nelson <i>et al.</i> , 2017)    |
| <i>E. coli</i> K12 / pBBRMCS-5- <i>bgl3C</i>                                          | <i>bgl3C</i> <sup>+</sup> ;Gm <sup>r</sup>                                                                                                                                                               | (Nelson <i>et al.</i> , 2017)    |
| <i>E. coli</i> K12 / pBBRMCS-5- <i>bgl3D</i>                                          | <i>bgl3D</i> <sup>+</sup> ;Gm <sup>r</sup>                                                                                                                                                               | (Nelson <i>et al.</i> , 2017)    |
| <i>C. japonicus</i> Ueda 107                                                          | Wild Type                                                                                                                                                                                                | Laboratory collection            |
| <i>C. japonicus</i> $\Delta$ <i>bgl3A</i>                                             | Ueda 107 $\Delta$ <i>bgl3A</i> <sup>a</sup>                                                                                                                                                              | (Nelson <i>et al.</i> , 2017)    |
| <i>C. japonicus</i> $\Delta$ <i>bgl3B</i>                                             | Ueda 107 $\Delta$ <i>bgl3B</i> <sup>b</sup>                                                                                                                                                              | (Nelson <i>et al.</i> , 2017)    |
| <i>C. japonicus</i> $\Delta$ <i>bgl3C</i>                                             | Ueda 107 $\Delta$ <i>bgl3C</i> <sup>c</sup>                                                                                                                                                              | (Nelson <i>et al.</i> , 2017)    |
| <i>C. japonicus</i> $\Delta$ <i>bgl3D</i>                                             | Ueda 107 $\Delta$ <i>bgl3D</i> <sup>d</sup>                                                                                                                                                              | (Nelson <i>et al.</i> , 2017)    |
| <i>C. japonicus</i> $\Delta$ <i>bgl3A</i> $\Delta$ <i>bgl3B</i>                       | Ueda 107 $\Delta$ <i>bgl3A</i> $\Delta$ <i>bgl3B</i>                                                                                                                                                     | (Nelson <i>et al.</i> , 2017)    |
| <i>C. japonicus</i> $\Delta$ <i>bgl3A</i> $\Delta$ <i>bgl3C</i>                       | Ueda 107 $\Delta$ <i>bgl3A</i> $\Delta$ <i>bgl3C</i>                                                                                                                                                     | (Nelson <i>et al.</i> , 2017)    |
| <i>C. japonicus</i> $\Delta$ <i>bgl3A</i> $\Delta$ <i>bgl3D</i>                       | Ueda 107 $\Delta$ <i>bgl3A</i> $\Delta$ <i>bgl3D</i>                                                                                                                                                     | (Nelson <i>et al.</i> , 2017)    |
| <i>C. japonicus</i> $\Delta$ <i>bgl3B</i> $\Delta$ <i>bgl3C</i>                       | Ueda 107 $\Delta$ <i>bgl3B</i> $\Delta$ <i>bgl3C</i>                                                                                                                                                     | (Nelson <i>et al.</i> , 2017)    |
| <i>C. japonicus</i> $\Delta$ <i>bgl3B</i> $\Delta$ <i>bgl3D</i>                       | Ueda 107 $\Delta$ <i>bgl3B</i> $\Delta$ <i>bgl3D</i>                                                                                                                                                     | (Nelson <i>et al.</i> , 2017)    |
| <i>C. japonicus</i> $\Delta$ <i>bgl3C</i> $\Delta$ <i>bgl3D</i>                       | Ueda 107 $\Delta$ <i>bgl3C</i> $\Delta$ <i>bgl3D</i>                                                                                                                                                     | (Nelson <i>et al.</i> , 2017)    |
| <i>C. japonicus</i> $\Delta$ <i>bgl3A</i> $\Delta$ <i>bgl3B</i> $\Delta$ <i>bgl3C</i> | Ueda 107 $\Delta$ <i>bgl3A</i> $\Delta$ <i>bgl3B</i> $\Delta$ <i>bgl3C</i>                                                                                                                               | (Nelson <i>et al.</i> , 2017)    |
| <i>C. japonicus</i> $\Delta$ <i>bgl3A</i> $\Delta$ <i>bgl3B</i> $\Delta$ <i>bgl3D</i> | Ueda 107 $\Delta$ <i>bgl3A</i> $\Delta$ <i>bgl3B</i> $\Delta$ <i>bgl3D</i>                                                                                                                               | (Nelson <i>et al.</i> , 2017)    |
| <i>C. japonicus</i> $\Delta$ <i>bgl3A</i> $\Delta$ <i>bgl3C</i> $\Delta$ <i>bgl3D</i> | Ueda 107 $\Delta$ <i>bgl3A</i> $\Delta$ <i>bgl3C</i> $\Delta$ <i>bgl3D</i>                                                                                                                               | (Nelson <i>et al.</i> , 2017)    |
| <i>C. japonicus</i> $\Delta$ <i>bgl3B</i> $\Delta$ <i>bgl3C</i> $\Delta$ <i>bgl3D</i> | Ueda 107 $\Delta$ <i>bgl3B</i> $\Delta$ <i>bgl3C</i> $\Delta$ <i>bgl3D</i>                                                                                                                               | (Nelson <i>et al.</i> , 2017)    |
| <i>C. japonicus</i> $\Delta$ 4 $\beta$ G                                              | Ueda 107 $\Delta$ <i>bgl3A</i> $\Delta$ <i>bgl3B</i> $\Delta$ <i>bgl3C</i> $\Delta$ <i>bgl3D</i>                                                                                                         | (Nelson <i>et al.</i> , 2017)    |
| <i>C. japonicus</i> $\Delta$ <i>xyIA</i>                                              | Ueda 107 $\Delta$ <i>xyIA</i> <sup>e</sup>                                                                                                                                                               | (Nelson <i>et al.</i> , 2016)    |
| <i>C. japonicus</i> $\Delta$ 4 $\beta$ G $\Delta$ <i>xyIA</i>                         | Ueda 107 $\Delta$ <i>bgl3A</i> $\Delta$ <i>bgl3B</i> $\Delta$ <i>bgl3C</i> $\Delta$ <i>bgl3D</i> $\Delta$ <i>xyIA</i>                                                                                    | This study                       |
| <i>C. japonicus</i> $\Delta$ <i>xyI31A</i>                                            | Ueda 107 $\Delta$ <i>xyI31A</i> <sup>f</sup>                                                                                                                                                             | (Larsbrink <i>et al.</i> , 2014) |
| <b>Plasmids</b>                                                                       |                                                                                                                                                                                                          |                                  |

|                         |                                                                                                         |                                |
|-------------------------|---------------------------------------------------------------------------------------------------------|--------------------------------|
| pRK2013                 | ColE1 RK2-Mob <sup>+</sup> RK2-Tra <sup>+</sup> ; Km <sup>r</sup>                                       | (Figurski & Helinski, 1979)    |
| pK18 <i>mobsacB</i>     | pMB1 <i>ori mob<sup>+</sup> sacB<sup>+</sup></i> ; Km <sup>r</sup>                                      | (Schafer <i>et al.</i> , 1994) |
| pK18Δ <i>xylA</i>       | Contains 500bp upstream and downstream of <i>xylA</i> cloned into pK18 <i>mobsacB</i> ; Km <sup>r</sup> | (Nelson <i>et al.</i> , 2016)  |
| Primers                 |                                                                                                         |                                |
| Δ <i>xylA</i> CONF (5') | AGGTTTGTTCATC                                                                                           | (Nelson <i>et al.</i> , 2016)  |
| Δ <i>xylA</i> CONF (3') | GAAGTTGAAASCTGCCTG                                                                                      | (Nelson <i>et al.</i> , 2016)  |
| <i>xylA</i> INT (5')    | GAATTCGCATCGGCAAAA                                                                                      | (Nelson <i>et al.</i> , 2016)  |
| <i>xylA</i> INT (3')    | TCTAGAACCGCCCCAGAA                                                                                      | (Nelson <i>et al.</i> , 2016)  |

<sup>a</sup> Gene locus CJA\_0204

<sup>b</sup> Gene locus CJA\_1497

<sup>c</sup> Gene locus CJA\_0223

<sup>d</sup> Gene locus CJA\_1140

<sup>e</sup> Gene locus CJA\_3061

<sup>f</sup> Gene locus CJA\_2706

## References

- Bradford, M.M., (1976) A rapid and sensitive method for the quantitation of microgram quantities of protein utilizing the principle of protein-dye binding. *Analytical Biochemistry* **72**: 248-254.
- Figurski, D.H. & D.R. Helinski, (1979) Replication of an origin-containing derivative of plasmid RK2 dependent on a plasmid function provided in *trans*. *Proceeding of the National Academy of Sciences* **76**: 1684-1652.
- Larsbrink, J., A.J. Thompson, M. Lundqvist, J.G. Gardner, G.J. Davies & H. Brumer, (2014) A complex gene locus enables xyloglucan utilization in the model saprophyte *Cellvibrio japonicus*. *Molecular Microbiology* **94**: 418-433.
- Nelson, C.E., N.R. Beri & J.G. Gardner, (2016) Custom fabrication of biomass containment devices using 3-D printing enables bacterial growth analyses with complex insoluble substrates. *Journal of microbiological methods* **130**: 136-143.
- Nelson, C.E., A. Rogowski, C. Morland, J.A. Wilhide, H.J. Gilbert & J.G. Gardner, (2017) Systems analysis in *Cellvibrio japonicus* resolves predicted redundancy of beta-glucosidases and determines essential physiological functions. *Molecular Microbiology* **104**: 294-305.
- Schafer, A., A. Tauch, W. Jager, J. Kalinowski, G. Theirbach & A. Puhler, (1994) Small mobilization multi-purpose cloning vectors derived from the *Escherichia coli* plasmids pK18 and pK19: selection of defined deletions in the chromosome of *Corynebacterium glutamicum*. *Gene* **145**: 69-73.

### Supplemental Figures

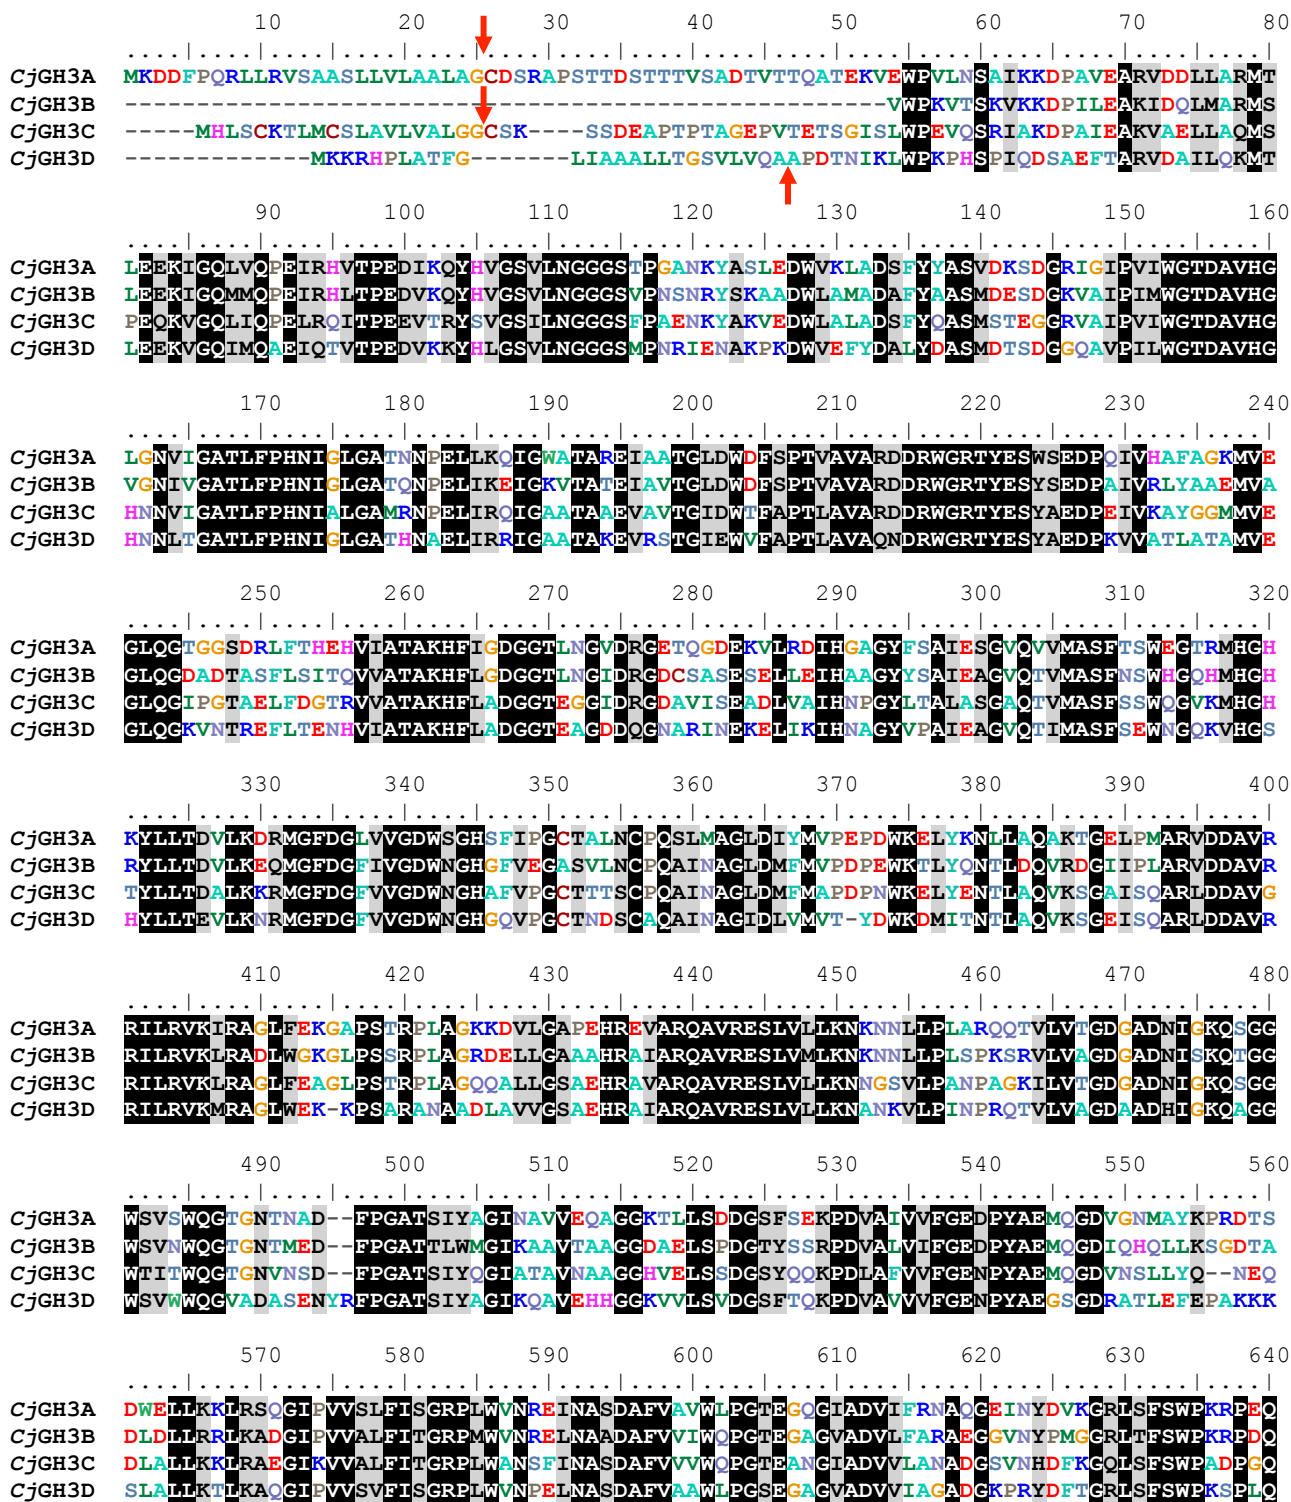

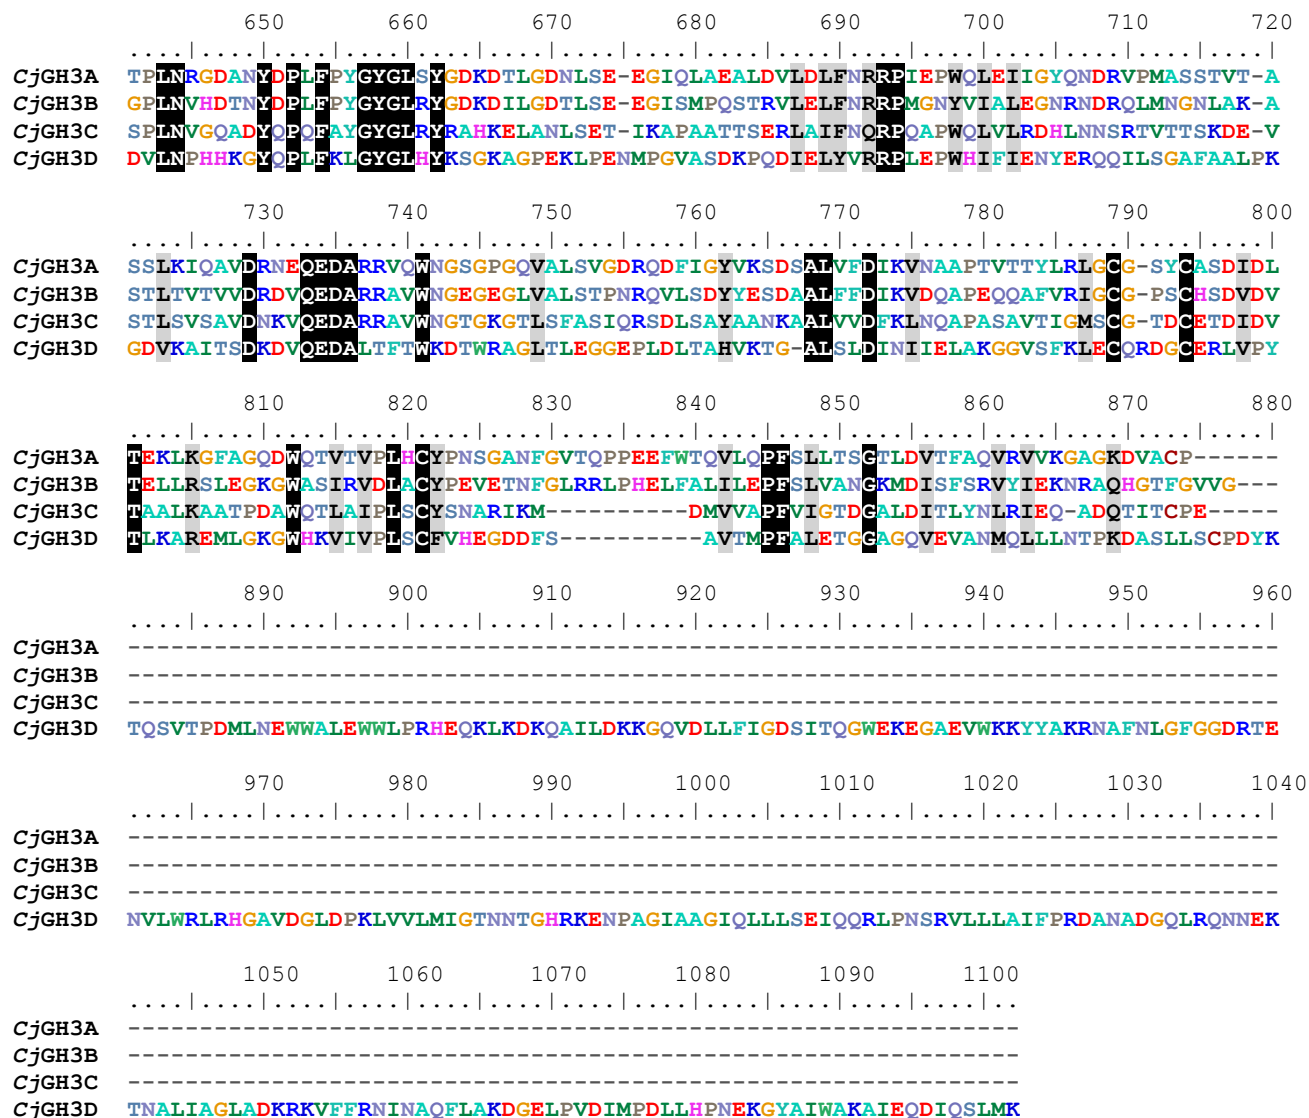

**Fig S1. Amino acid sequence alignment of the CjGH3 enzymes.** Signal peptide cleavage sites are indicated by red arrows. The cleavable signal peptide is removed by the action of signal peptidase II in case of Bgl3A and Bgl3C, and signal peptidase I in case of Bgl3D.

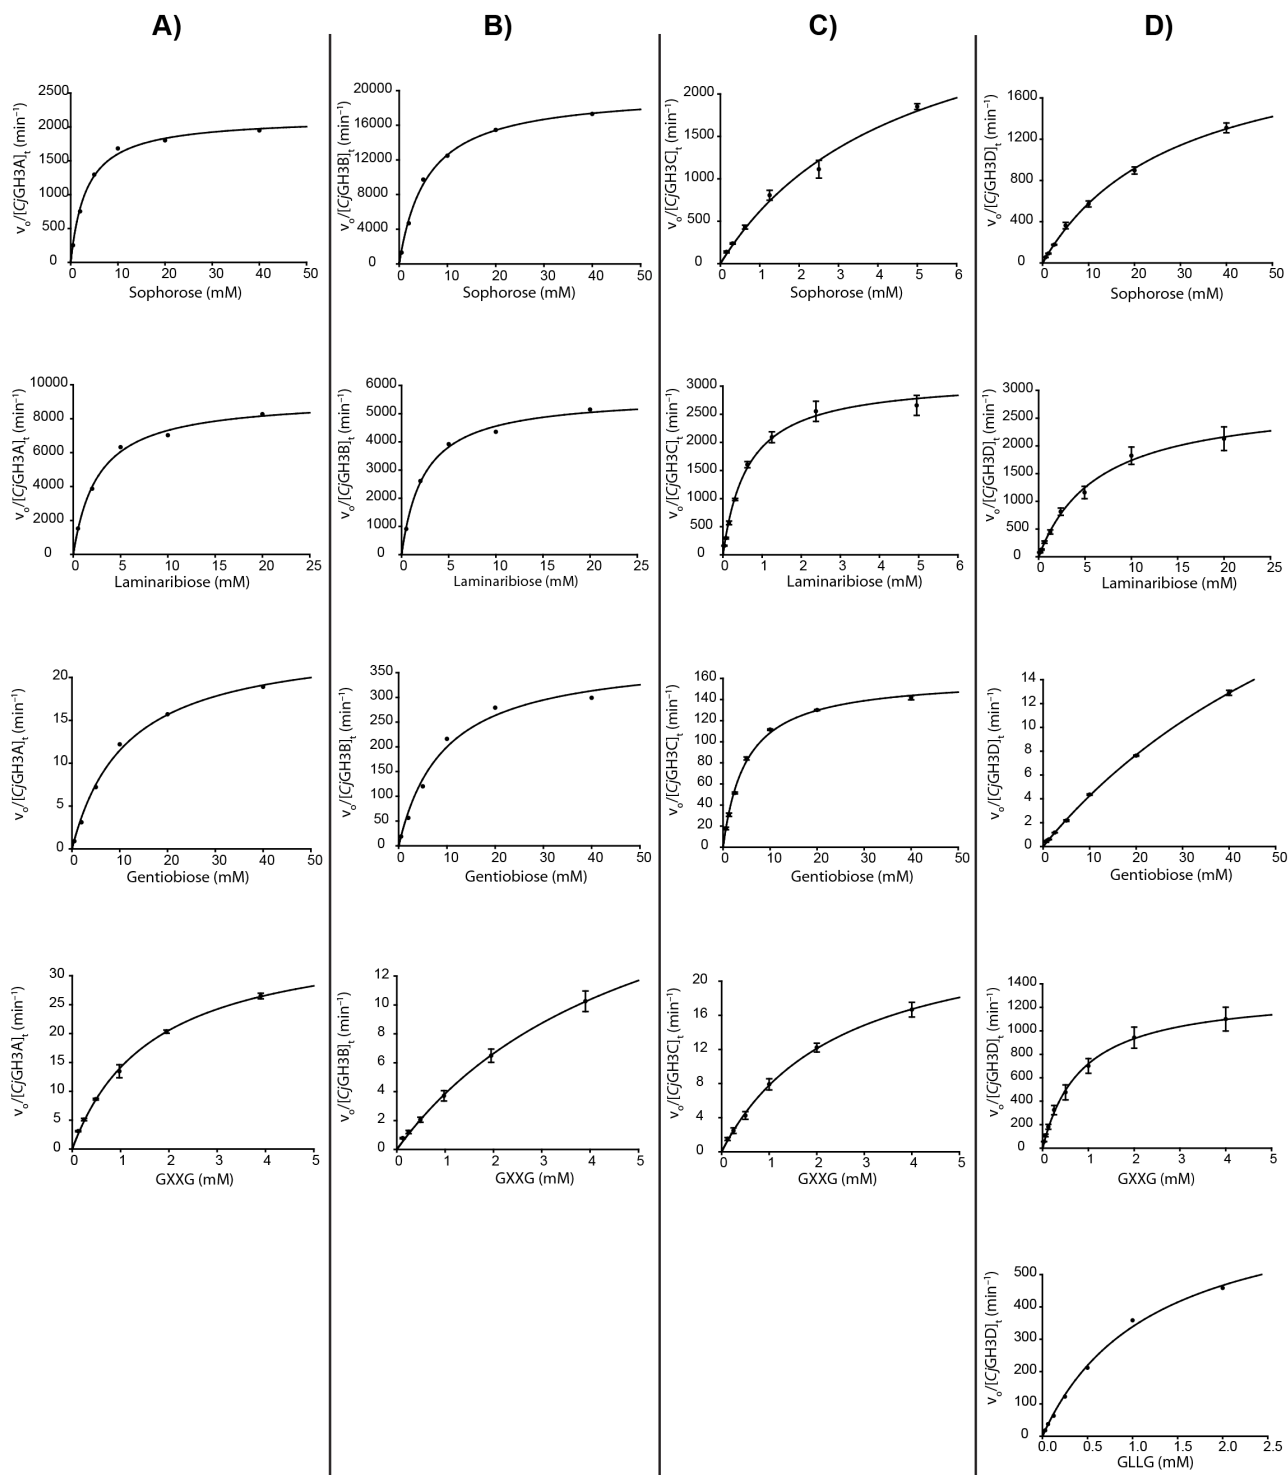

**Fig S2. Kinetic parameters of GH3 enzymes against different gluco-disaccharides and xyloglucan-based oligosaccharides. (A) Bgl3A. (B) Bgl3B. (C) Bgl3C. (D) Bgl3D. These data are summarized in Table 1.**

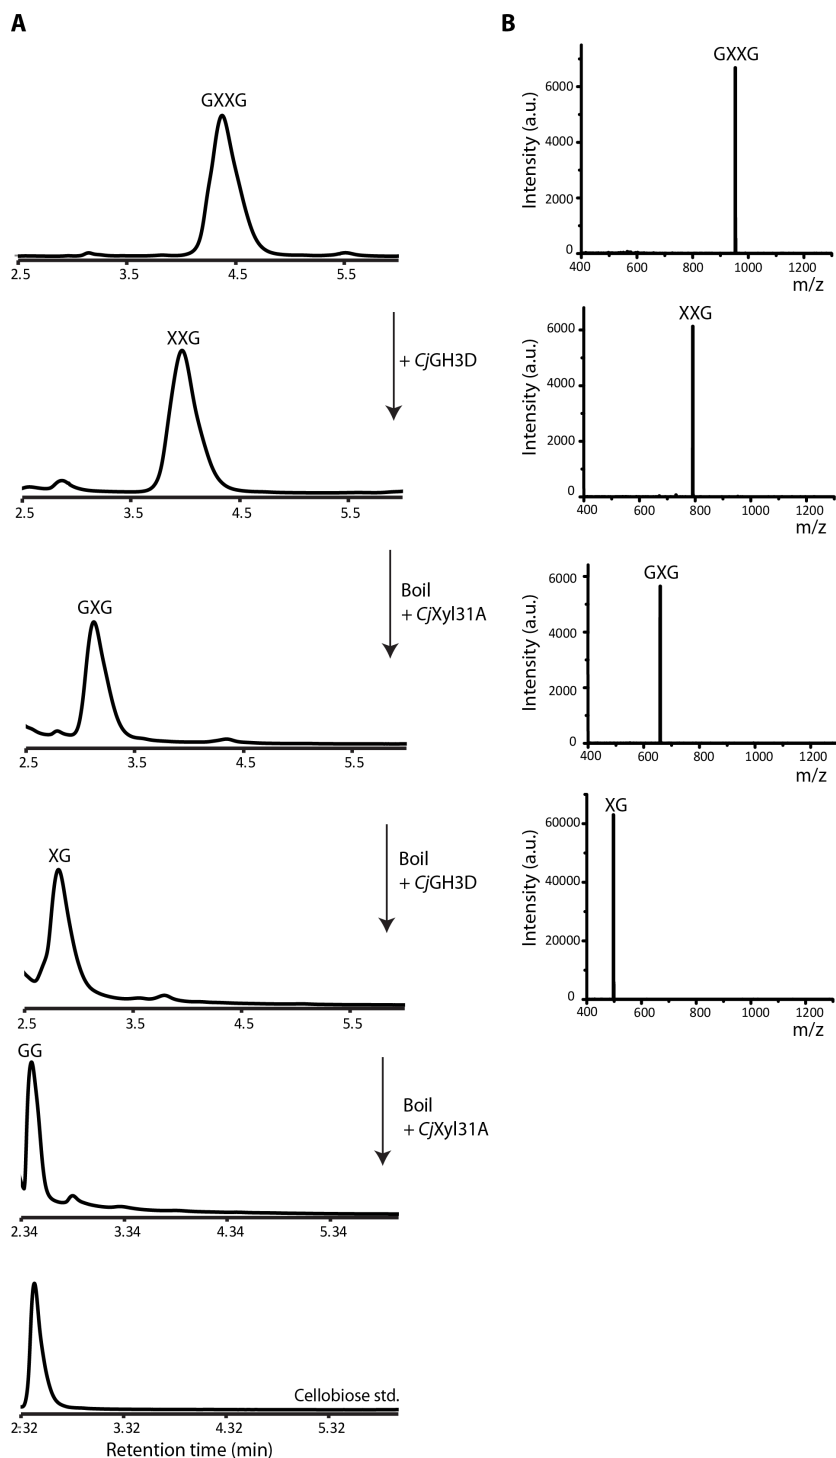

**Fig S3. Sequential digestion of GXXG by *CjGH3D* and *CjXyl31A* with a heat inactivation step between each treatment. (A) HPAEC-PAD analysis of GXXG and the product of each enzymatic step. (B) MALDI-TOF analysis of the same sample: GXXG ( $[M+Na]^+$  calculated: 953.8, observed: 953.29), XXG ( $[M+Na]^+$  calculated: 791.65, observed: 791.37), GXG ( $[M+Na]^+$  calculated: 659.54, observed: 659.18), and XG ( $[M+Na]^+$  calculated: 497.4, observed: 497.25).**

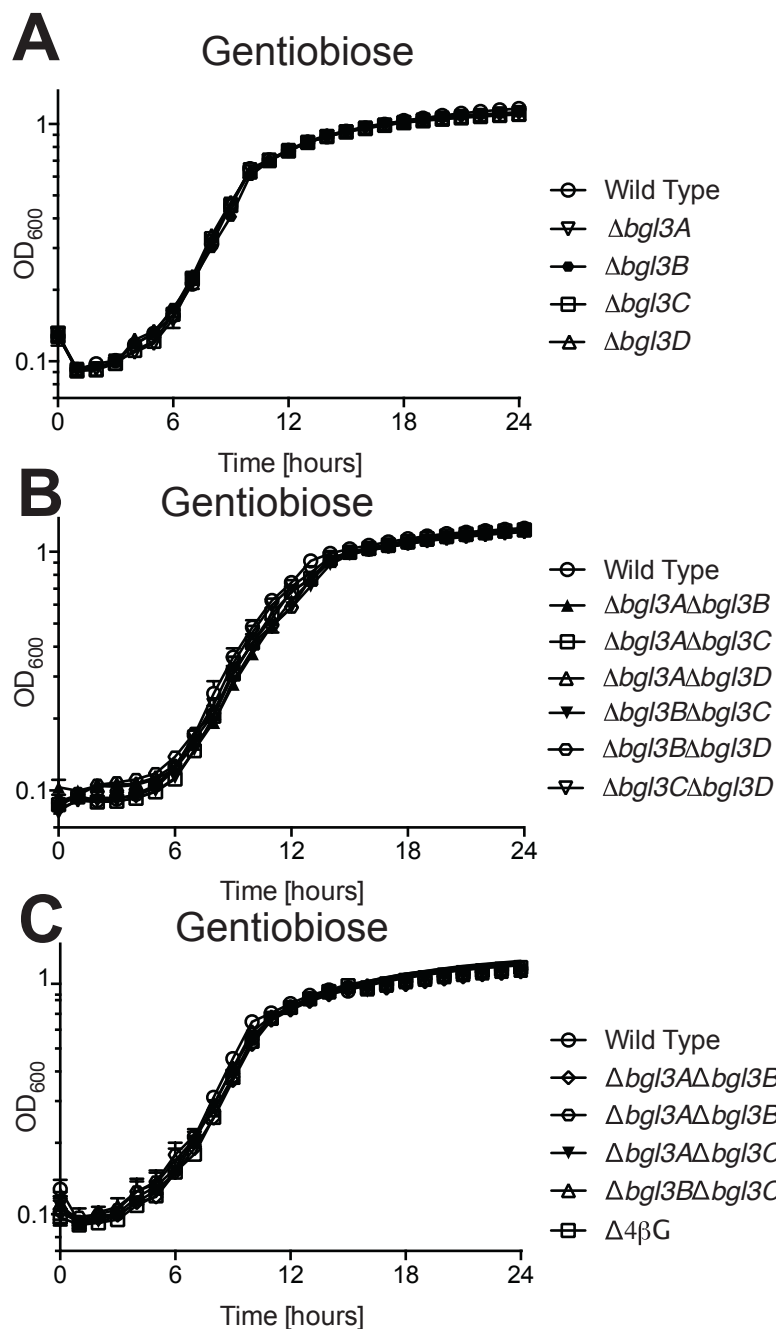

**Fig S5. Growth analysis of GH3 mutants on gentiobiose.** *C. japonicus* wild type and GH3 single (A), double (B), triple and quadruple (C) mutants were grown in defined media with 0.5% w:v gentiobiose as the sole carbon source for 24 hours at 30°C with a high level of aeration. Growth was monitored as optical density (OD) at 600 nm. Experiments were performed in biological triplicate with the error bars representing the standard deviation. Growth rates and maximum OD can be found in **Table S1**.

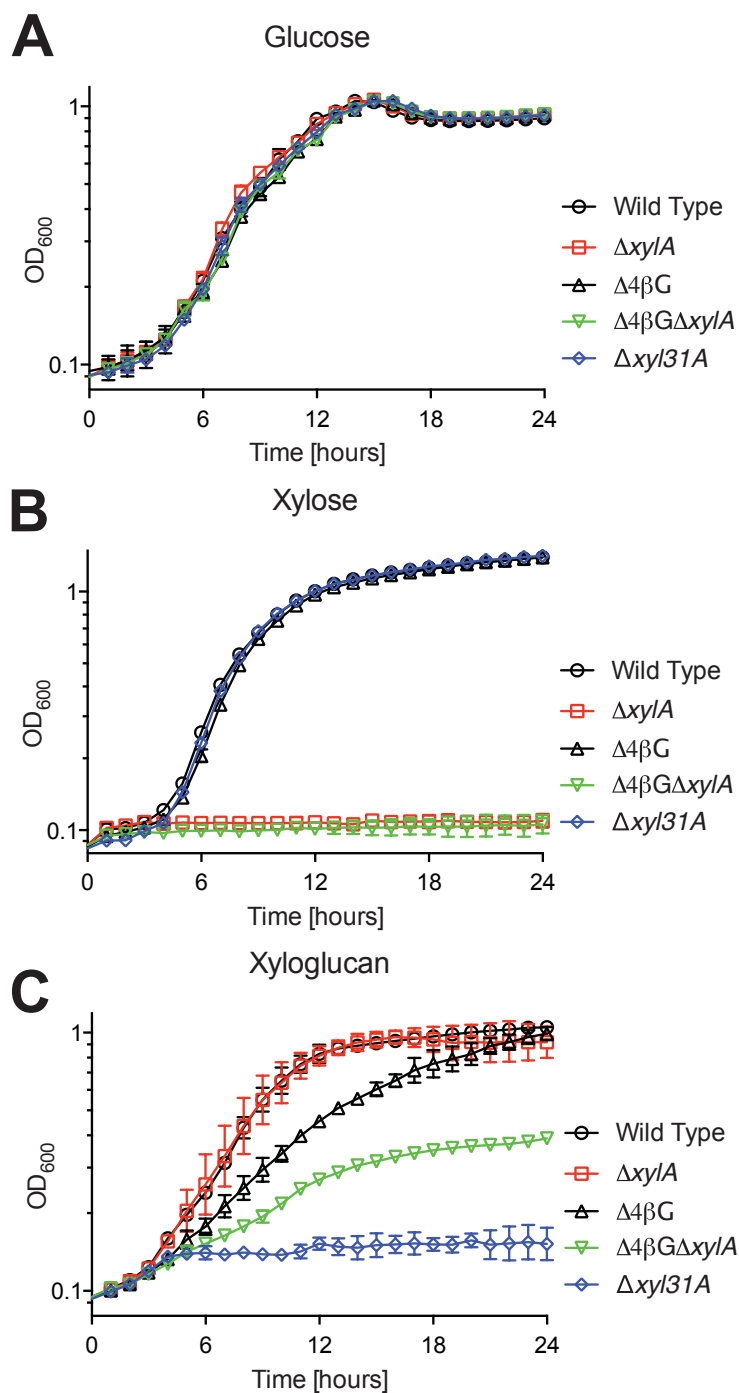

**Fig S6. Importance of xylose consumption during xyloglucan degradation.** *C. japonicus* wild type, the  $\Delta 4\beta G$  quadruple,  $\Delta xyIA$ ,  $\Delta xyI31A$ , and the  $\Delta 4\beta G \Delta xyIA$  quintuple mutants were grown with 0.5% w:v glucose (A), 0.5% w:v xylose (B), or 0.5% w:v xyloglucan (C) for 24 hours at 30°C with a high level of aeration. Growth was monitored as optical density (OD) at 600 nm. Experiments were performed in biological triplicate with the error bars representing the standard deviation. Growth rates and maximum OD can be found in **Table S1**.
